# Supplementary material
Source: PubMed Central journal article supplement (PMC30410)
Supplement: nar_29_3_e9__1.pdf [file nar_29_3_e9__1.pdf]

## SUPPLEMENTARY MATERIAL

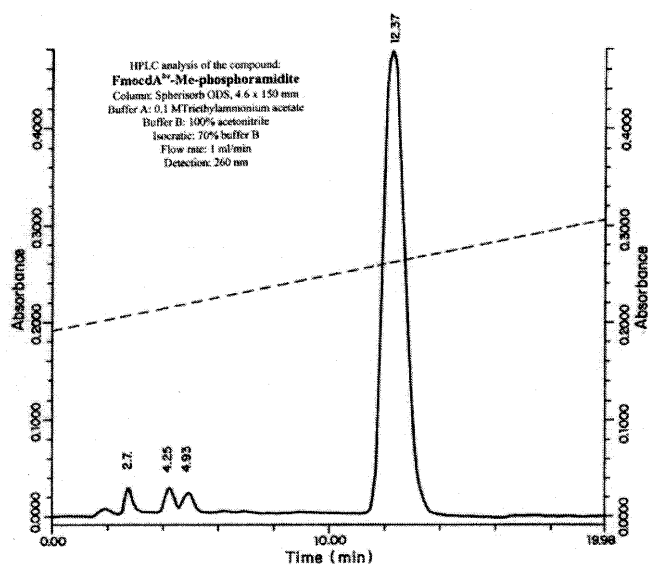

Figure S1.

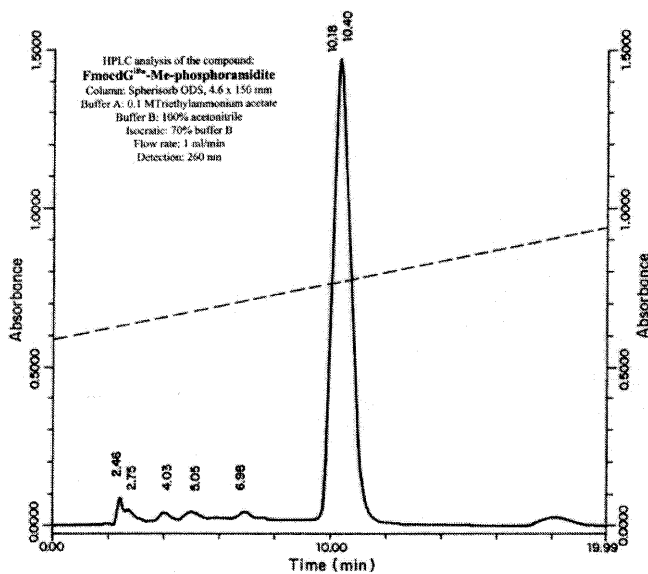

Figure S2.

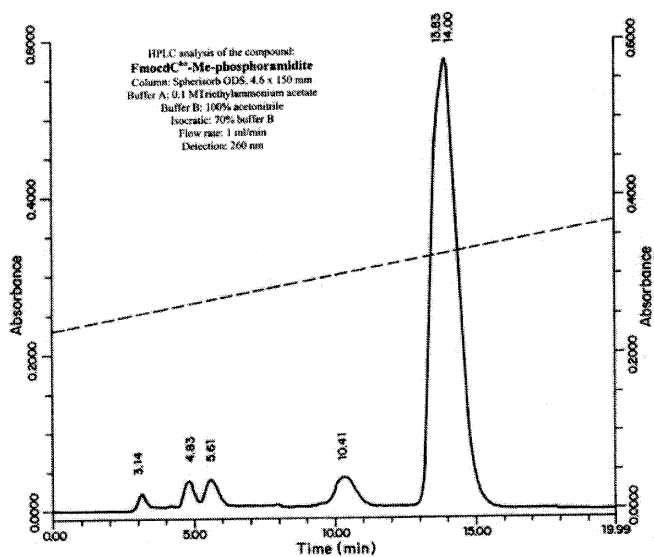

Figure S3.

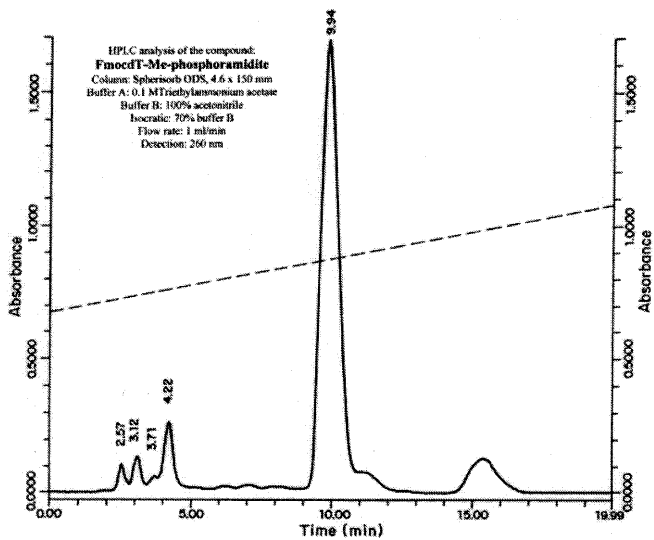

Figure S4.

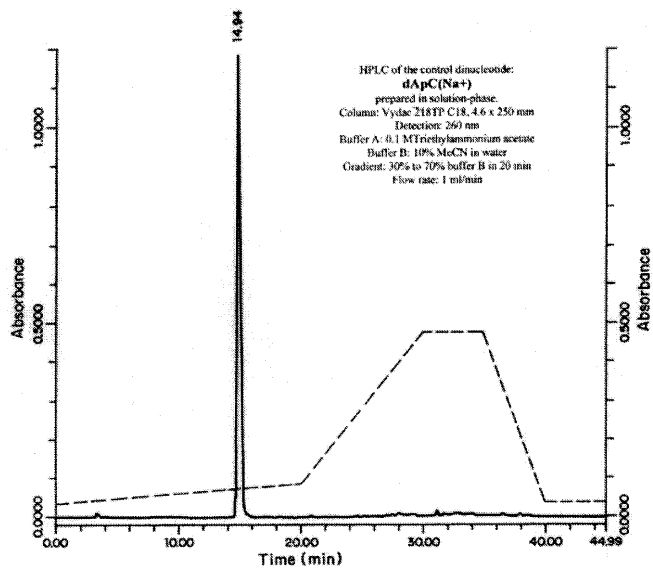

Figure S5.

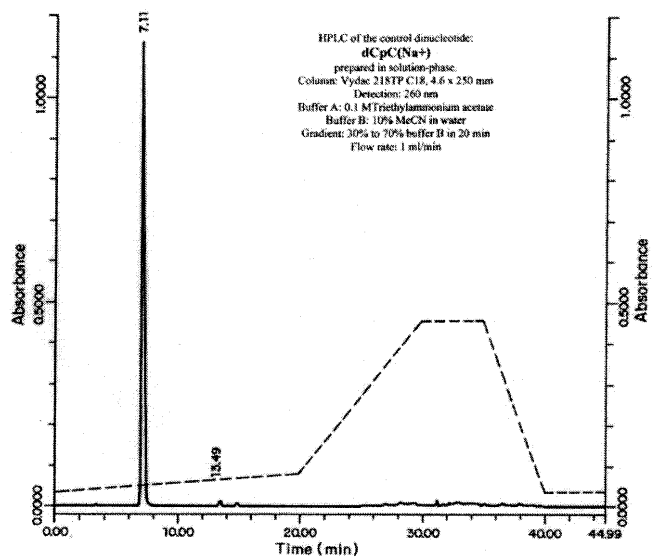

Figure S6.

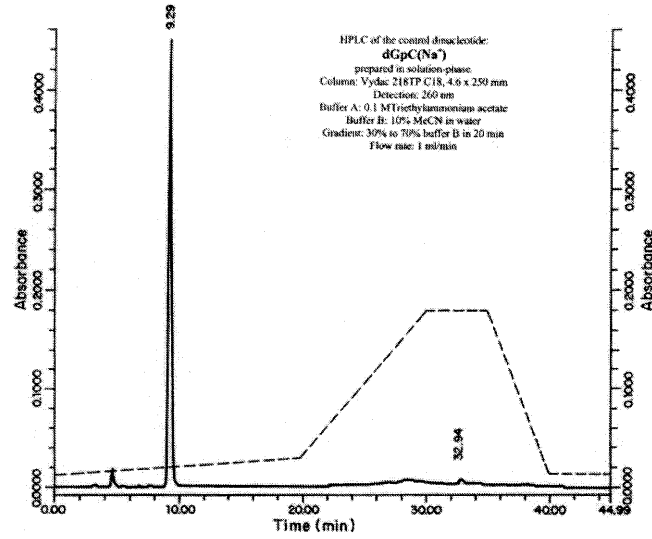

Figure S7.

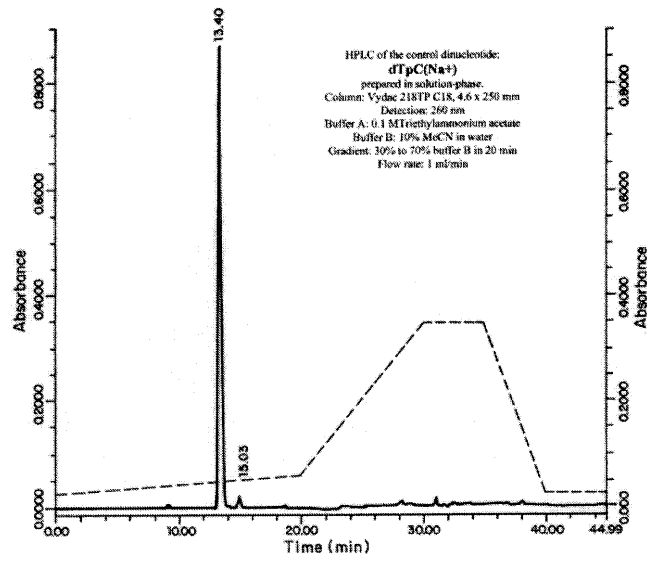

Figure S8.

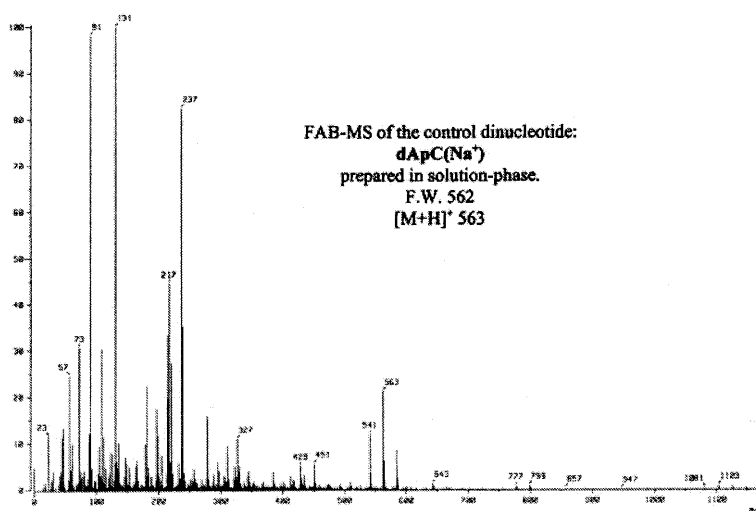

Figure S9.

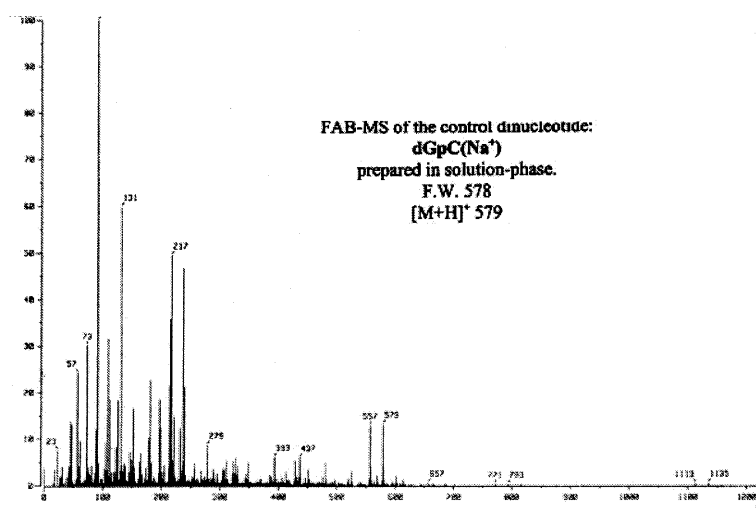

Figure S10.

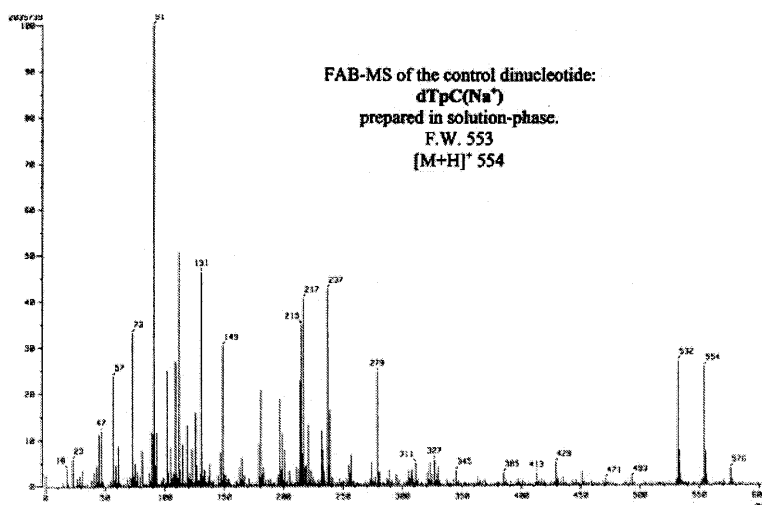

Figure S11.

**HPLC calibration curves for dinucleotides:  
dCpC(Na<sup>+</sup>), dGpC(Na<sup>+</sup>), dTpC(Na<sup>+</sup>), dApC(Na<sup>+</sup>)  
Column: Vydac 218TP54 C18, 4.6x250 mm  
Gradient: 30%-->70% buffer B in 20 min  
Buffer A: TEAA 0.1M, Buffer B: MeCN:H2O 1/9,  
Detection: 260 nm**

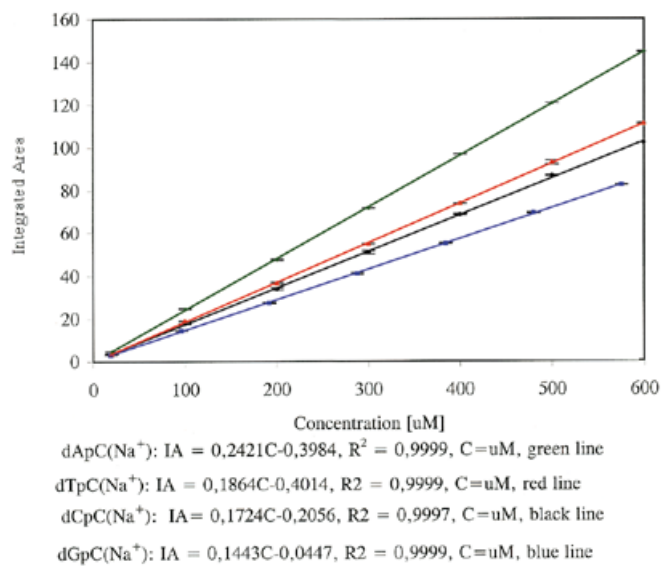

Figure S12.

**Determination of the Molar Extinction Coefficient for dinucleotides:  
dCpC(Na<sup>+</sup>), dGpC(Na<sup>+</sup>), dTpC(Na<sup>+</sup>), dApC(Na<sup>+</sup>),  
in 10mM phosphate buffer, pH 7.2  
Temperature: 33°C**

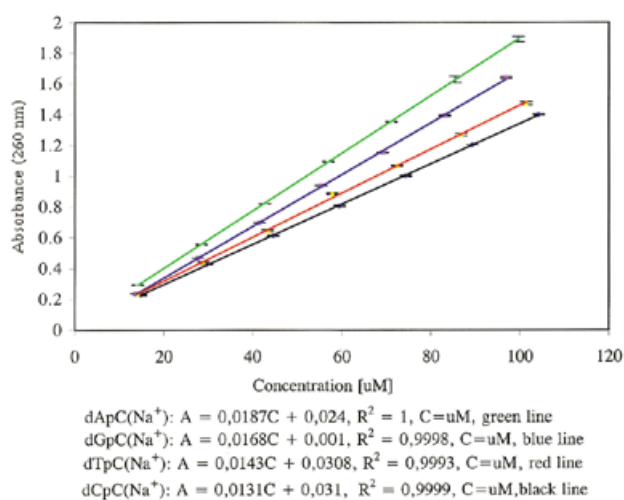

Figure S13.
